# Supplementary material for: The Relationships Between Patient Experience and Quality and Utilization of Primary Care Services
Source: PubMed Central journal article supplement — J Patient Exp. 2020 May 26;7(6):1678–84. doi: 10.1177/2374373520924190 (PMC7786755; doi:10.1177/2374373520924190), 2020-05-26
Supplement: Appendix_JPX.pdf [file Appendix_JPX.pdf]

**Appendix A: Adjusted Associations between Patient Experience Measures and Patient No Show Counts**

|                                                           |                                 | <b>No-show counts<br/>(2 Years)</b>           | <b>Adjusted<br/>P values<sup>1</sup></b> | <b>No-show counts<br/>(5 Years)</b>            | <b>Adjusted<br/>P values<sup>1</sup></b> |
|-----------------------------------------------------------|---------------------------------|-----------------------------------------------|------------------------------------------|------------------------------------------------|------------------------------------------|
| <b>Patient Reported Measures of Experiences with Care</b> | <b>Access</b>                   | 0.9977<br>(0.9918, 1.0036)<br><i>p</i> =0.44  | P=0.57                                   | 0.9981<br>(0.9937, 1.0026)<br><i>p</i> =0.41   | P=0.52                                   |
|                                                           | <b>Visit Experience</b>         | 1.0011<br>(0.9965, 1.0058)<br><i>p</i> =0.63  | P=0.63                                   | 1.0016<br>(0.9975, 1.0058)<br><i>p</i> =0.44   | P=0.53                                   |
|                                                           | <b>Nurse/Staff Experience</b>   | 0.9977<br>(0.9927, 1.0028)<br><i>p</i> =0.38  | P=0.52                                   | 0.9993<br>(0.9951, 1.0036)<br><i>p</i> =0.76   | P=0.82                                   |
|                                                           | <b>Care Provider Experience</b> | 0.9943<br>(0.9895, 0.9991)<br><i>p</i> =0.02* | P=0.04                                   | 0.9950<br>(0.9915, 0.9985)<br><i>p</i> =0.005* | P=0.01                                   |
|                                                           | <b>Personal Issues</b>          | 1.0060<br>(0.9993, 1.0128)<br><i>p</i> =0.08  | P=0.14                                   | 1.0024<br>(0.9973, 1.0076)<br><i>p</i> =0.35   | P=0.49                                   |
|                                                           | <b>Overall Assessment</b>       | 0.9976<br>(0.9941, 1.0012)<br><i>p</i> =0.19  | P=0.27                                   | 0.9974<br>(0.9947, 1.0001)<br><i>p</i> =0.06   | P=0.09                                   |

<sup>1</sup>P values adjusted for multiple hypothesis testing using false discovery rates (FDR) methods
